# Supplementary material
Source: PubMed Central journal article supplement (PMC4849136)
Supplement: NIHMS779687-supplement-Supplemental.pdf [file NIHMS779687-supplement-Supplemental.pdf]

# Comparison of GC-MS and GC×GC-MS in the Analysis of Human Serum Samples for Biomarker Discovery

Jason H. Winnike<sup>‡¶</sup>, Xiaoli Wei<sup>†¶</sup>, Kevin J. Knagge<sup>‡</sup>, Steven D. Colman<sup>‡</sup>, Simon G. Gregory<sup>‡¶</sup>,  
Xiang Zhang<sup>†\*</sup>

<sup>‡</sup> David H. Murdock Research Institute, Kannapolis, NC 28081, USA.

<sup>†</sup> Department of Chemistry, Center of Regulatory & Environmental Analytical Metabolomics (CREAM), University of Louisville, KY 40292, USA.

<sup>¶</sup> Duke Molecular Physiology Institute, Department of Medicine, Duke University, Durham, NC 27701, USA.

<sup>¶</sup> These two authors contributed equally to this study.

CORRESPONDING AUTHOR: Xiang Zhang, Ph.D. Department of Chemistry, University of Louisville, 2320 South Brook Street, Louisville, KY 40292, USA. Phone: +01 502 852 8878. Fax: +01 502 852 8149. E-mail: xiang.zhang@louisville.edu

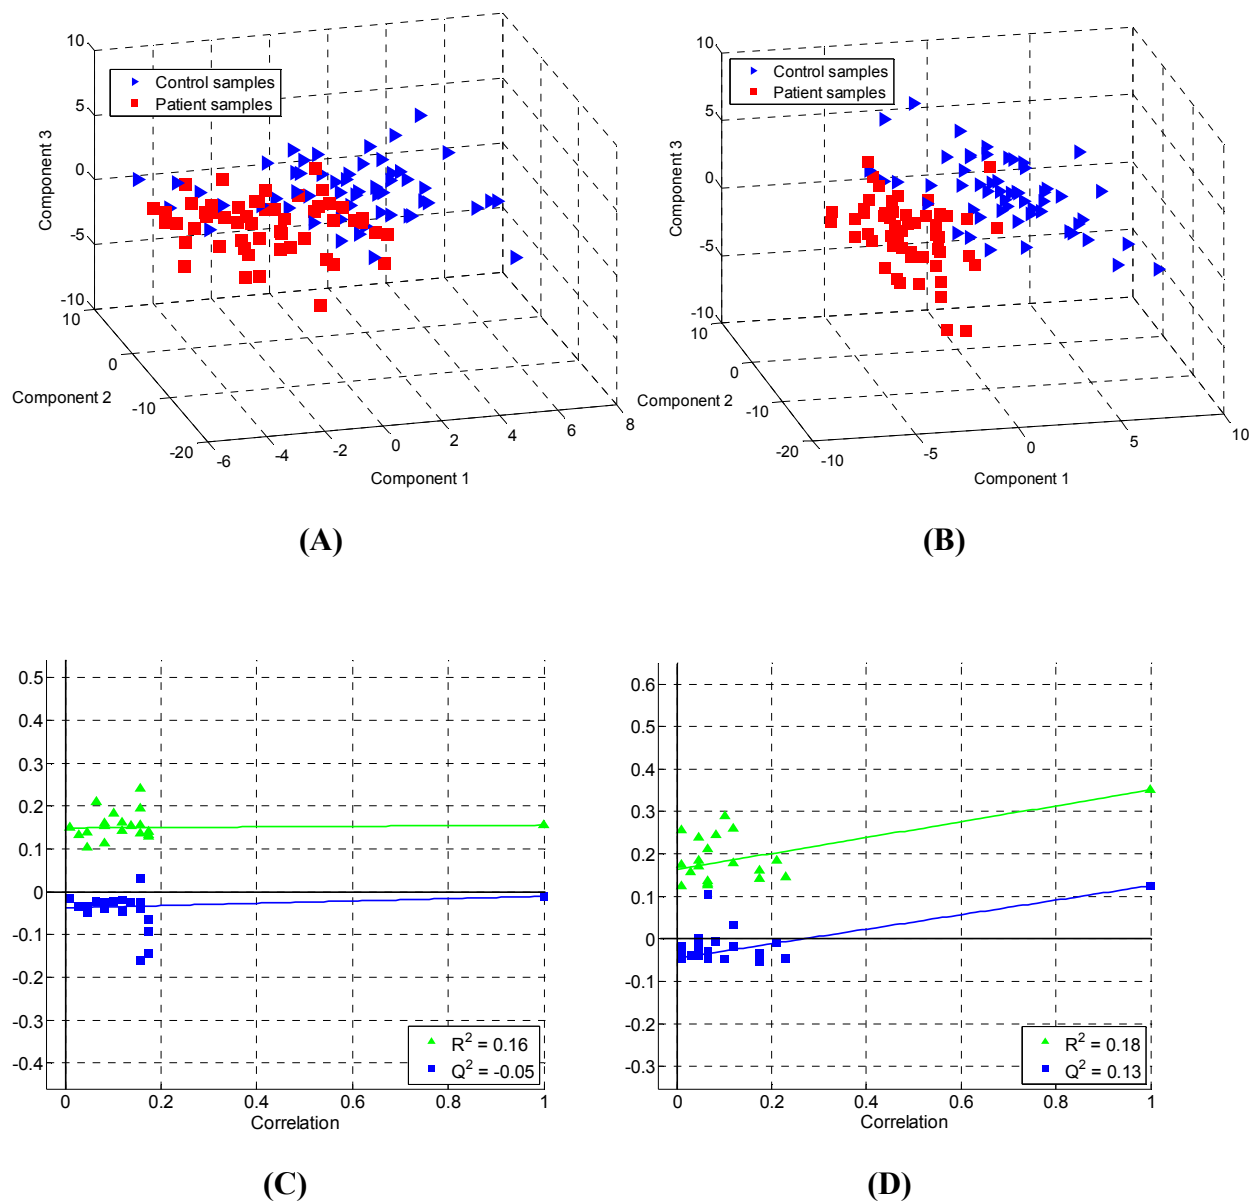

**Figure S1.** PLSDA analysis of the metabolite profiles of all patient samples. (A) is the clustering result of GC-MS data. (B) is the clustering result of GCxGC-MS data. (C) is the cross validation result of the PLSDA for analysis of GC-MS data. The magnitudes of  $R^2$  and  $Q^2$  are ( $R^2 = 0.16$ ,  $Q^2 = -0.05$ ). (D) is the cross validation results of the PLSDA for analysis of GCxGC-MS data with  $R^2 = 0.18$  and  $Q^2 = 0.13$ .

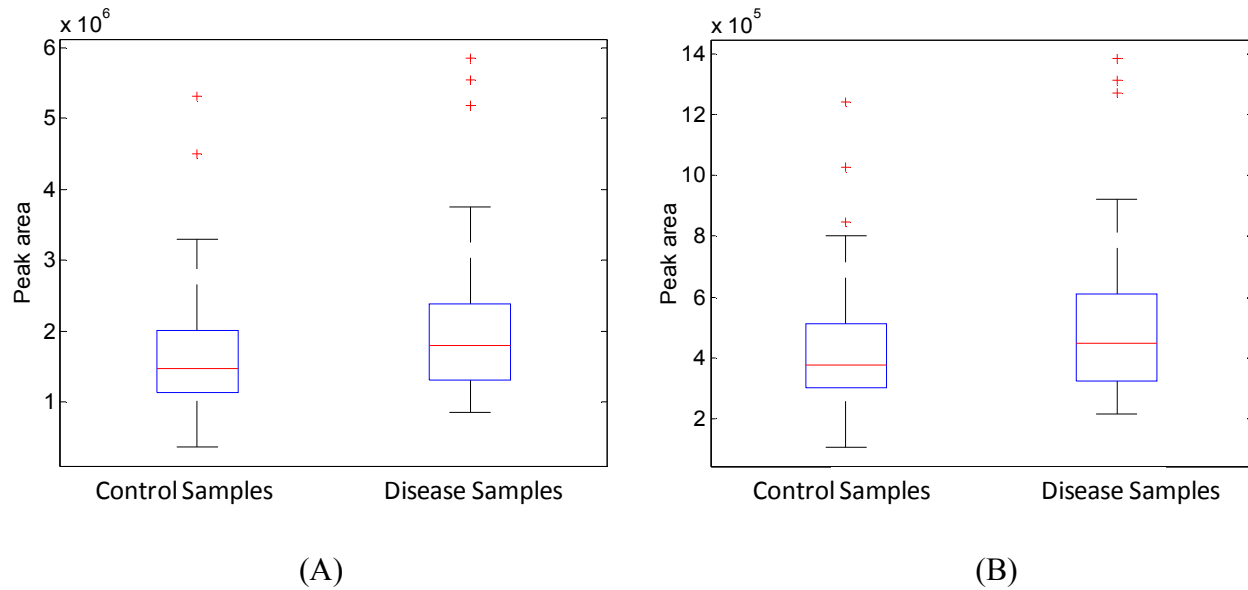

**Figure S2.** Abundance distribution of metabolite 5 between the control and the patient samples. The fold-change of this metabolite between the patient samples and the control samples is 1.18 with  $p = 0.018$  in the GC-MS data, and 1.17 in the GC $\times$ GC-MS data with  $p = 0.022$ .

**Table S1.** Data processing parameters used in LECO ChromaTOF.

| <b>Parameters Applicable to Both GC-MS and GC×GC-MS</b> |                                 |
|---------------------------------------------------------|---------------------------------|
| Baseline Offset                                         | 1                               |
| Number of Data Points Averaged for Baseline Smoothing   | Auto                            |
| Peak Width for Peak Finding                             | GC-MS: 4, GC×GC-MS: 7.5         |
| Minimum Number of Apexing Masses for Peak Finding       | 2                               |
| Minimum SNR for Peak Finding                            | 50                              |
| Library Search Mode                                     | Normal, Forward                 |
| Library Hits Returned per Peak                          | 10                              |
| Minimum/Maximum Molecular Weight Allowed                | 0/1000                          |
| Relative Mass Threshold for Library Searching           | 10                              |
| Minimum Similarity Match Before Name is Assigned        | 600                             |
| Libraries Used for Searching                            | In-House, LECO-Fiehn Rtx5, NIST |
| Mass Used for Area/Height Calculation                   | Unique                          |
| <b>Parameters Specific to GC×GC-MS</b>                  |                                 |
| Match Required to Combine Peaks in the Second Dimension | 500                             |
| Second Dimension Peak Width                             | 0.15                            |
| Minimum SNR for Subpeak to be Retained                  | 6                               |
| Integration Approach                                    | Traditional                     |

**Table S2.** Metabolite peaks detected by the GC-MS platform as potential biomarkers that have significant abundance differences between the patient and control samples. Fold change is the ratio of mean peak area of a metabolite in the patient samples divided by the mean peak area of the same metabolite in the control samples.

| Peak ID | $t_R$ (s) | $p$ value | Fold change |
|---------|-----------|-----------|-------------|
| 1       | 2361      | 0.009     | 1.31        |
| 2       | 1124      | 0.020     | 0.87        |
| 3       | 2087      | 0.004     | 0.49        |
| 4       | 1947      | 0.017     | 1.23        |
| 5       | 2394      | 0.018     | 1.18        |
| 6       | 2167      | 0.001     | 1.40        |
| 7       | 1779      | 0.001     | 0.90        |
| 8       | 2033      | 0.006     | 1.15        |
| 9       | 2352      | 0.008     | 0.74        |
| 10      | 1346      | 0.004     | 0.80        |
| 11      | 736       | 0.007     | 0.87        |
| 12      | 1462      | 0.037     | 0.90        |
| 13      | 956       | 0.034     | 1.48        |
| 14      | 1648      | 0.046     | 0.91        |
| 15      | 936       | 0.004     | 0.86        |
| 16      | 886       | 0.015     | 0.91        |
| 17      | 2176      | 0.035     | 0.91        |
| 18      | 2349      | 0.036     | 0.87        |
| 19      | 2626      | 0.036     | 1.10        |
| 20      | 2368      | 0.000     | 1.46        |
| 21      | 1671      | 0.012     | 0.89        |
| 22      | 1692      | 0.025     | 1.08        |
| 23      | 1082      | 0.024     | 1.08        |

**Table S3.** Metabolite peaks detected by the GC×GC-MS platform as potential biomarkers that have significant abundance differences between the patient and control samples. Fold change is the ratio of mean peak area of a metabolite in the patient samples divided by the mean peak area of the same metabolite in the control samples.

| Peak ID | <sup>1</sup> t <sub>R</sub> (s) | <sup>2</sup> t <sub>R</sub> (s) | p value | Fold change |
|---------|---------------------------------|---------------------------------|---------|-------------|
| 1       | 2372                            | 1.336                           | 0.024   | 1.25        |
| 2       | 1135                            | 1.041                           | 0.008   | 0.86        |
| 3       | 2093                            | 1.038                           | 0.021   | 0.66        |
| 4       | 1958                            | 1.120                           | 0.003   | 1.31        |
| 5       | 2404                            | 1.263                           | 0.022   | 1.17        |
| 6       | 2173                            | 1.236                           | 0.001   | 1.37        |
| 7       | 1793                            | 1.212                           | 0.001   | 0.90        |
| 8       | 2046                            | 1.402                           | 0.000   | 1.21        |
| 9       | 2365                            | 1.282                           | 0.017   | 0.80        |
| 10      | 2322                            | 1.139                           | 0.031   | 1.11        |
| 11      | 1542                            | 1.115                           | 0.034   | 1.36        |
| 12      | 2108                            | 1.040                           | 0.006   | 0.47        |
| 13      | 2098                            | 1.034                           | 0.032   | 0.51        |
| 14      | 2130                            | 1.024                           | 0.000   | 3.03        |
| 15      | 1496                            | 1.056                           | 0.003   | 0.78        |
| 16      | 1501                            | 1.066                           | 0.003   | 0.78        |
| 17      | 1271                            | 1.044                           | 0.002   | 2.05        |
| 18      | 1145                            | 1.035                           | 0.014   | 0.92        |
| 19      | 2143                            | 1.054                           | 0.000   | 0.58        |
| 20      | 1237                            | 1.002                           | 0.031   | 0.93        |
| 21      | 1563                            | 1.172                           | 0.012   | 0.75        |
| 22      | 2412                            | 1.188                           | 0.006   | 0.87        |
| 23      | 922                             | 1.120                           | 0.013   | 0.89        |
| 24      | 998                             | 1.178                           | 0.032   | 1.36        |
| 25      | 2329                            | 1.283                           | 0.010   | 1.16        |
| 26      | 832                             | 0.962                           | 0.009   | 0.62        |
| 27      | 1363                            | 1.365                           | 0.007   | 1.20        |
| 28      | 2453                            | 1.127                           | 0.015   | 1.07        |
| 29      | 1904                            | 1.342                           | 0.000   | 0.62        |
| 30      | 1825                            | 1.130                           | 0.018   | 1.35        |
| 31      | 1751                            | 1.356                           | 0.002   | 1.16        |
| 32      | 1807                            | 1.246                           | 0.001   | 0.73        |
| 33      | 1850                            | 1.086                           | 0.011   | 1.13        |
| 34      | 2230                            | 1.357                           | 0.006   | 1.18        |
